# Supplementary material for: Differences in unilateral chest press muscle activation and kinematics on a stable versus unstable surface while holding one versus two dumbbells
Source: PeerJ. 2015 Oct 27;3:e1365. doi: 10.7717/peerj.1365 (PMC4627906; doi:10.7717/peerj.1365)
Supplement: Supplemental Information 1 [file peerj-03-1365-s001.xlsx]

## Sheet: Pec
	flat2 m	flat2 p	cor1 m	cor1 p	flat1 m	flat1 p	cor2 m	cor2 p
1	22.4	110	22.4	71.8	21.9	59.4	31.2	109
2			13.7	34.6	24.5	60	16.8	52.1
3	36.7	167	53.7	183	46.6	184	34.4	151
4	8.04	24.4	12.1	33.5	17.7	60.6	5.26	14.9
5	17.6	66.2	24.6	62.2	36.1	87.9	20.6	73
7	5.22	16.7	6.42	14.2	3.99	9.44	4.19	10.8
8	4.53	10	3.16	7.88	4.39	11.2	3.58	8.97
10	17.7	49.9	21.2	78.3	26.1	85.7	15.9	57.9
11	151	605	135	381	180	430	257	812
12	8.19	18.7	8.39	21	6.98	20.4	6.15	16.6
13	5.34	13.3	5.44	13	4.07	11.7	5.49	14.9
14	6.77	26.8	9.64	22.6	11.3	28.7	9.38	27.9
15	85.8	316	113	817	93.4	191	105	707
16	163	556	304	642	248	788	224	680
17	56.4	208	54.3	195	80.6	264	42.4	179
18	24.9	50	7.8	22.5	10.6	25.8	9.69	20.5
19	210	541	175	724	251	775	177	631
20	97.3	389	162	517	147	459	73.9	259
21	120	523	97	344	156	597	88	262
22	125	582	151	507	143	646	111	547
ALL NONPARAMETRIC

## Sheet: Trap
	flat2 m	flat2 p	cor1 m	cor1 p	flat1 m	flat1 p	cor2 m	cor2 p
1	5.32	21.2	67.1	198	60.4	278	48.1	169
2			33.7	98.2	4.45	20.3	10.1	42.9
3	40.7	205	59.4	249	24.6	95	43.9	373
4	25.9	82.1	29.2	62.9	36.7	234	16.6	134
5	13.8	43.7	21.5	46.4	23.4	58	16.7	49.4
7	6.81	26.6	16.1	77.7	3.75	9.25	5.15	22.4
8	2.13	2.76	10.7	21.8	2.15	2.89
10	42.1	121	107	325	89.3	325	57.6	206
11	27.8	102	31.4	73.1	37.3	101	32.4	97.7
12	4.41	36.8	3.5	9.49	2.93	11.5	5.39	33.9
13	6.59	33.1	28.3	72.3	4.78	19.9	13.9	55.4
14	13.5	62.2	24.4	69	17.2	63.3	13.2	64.2
15	87.5	376	132	895	129	417	136	400
16	49.7	234	76.4	238	88.2	428	40.1	137
17	36.3	105	34.5	91.7	49.6	111	24.9	92.6
18	20.2	75.6	28.9	191	22.5	67.5	14.3	47.1
19	41.8	151	133	483	70.2	202	71.6	391
20	9.06	59.6	55	268	15.9	104	21.5	97.8
21	2.47	14.1	13.8	45.6	9.34	58.2	14.8	68.1
22	11.1	40.5	35.7	164	15.9	51.7	17.5	96.3
ALL NONPARAMETRIC

## Sheet: EO
	flat2 m	flat2 p	cor1 m	cor1 p	flat1 m	flat1 p	cor2 m	cor2 p
1	2.16	6.19	2.46	4.3	1.8	2.75	2.39	6.05
2			4.82	15.5	5.41	11.3	4.01	17.1
3	1.44	1.78	1.47	1.85	1.48	1.88	1.44	1.81
4	26.5	65.4	36.8	69.3	26.2	58.5	36	61.2
5	1.59	2.36	2.77	5.15	1.92	2.93	1.74	2.73
7	9.99	30.9	27.8	60.6	33.4	58.2	7.89	29.2
8	15	35.7	24.6	102	24.3	53.1	14.4	34.5
10	8.32	34	27.2	78.6	21.4	53	10.9	33.1
11	6.08	15.6	15.9	40.1	24.6	58.9	11.5	41.3
12	2.3	4.47	4.77	9.07	2.98	6.81	2.95	7.08
13	2.12	4.33	5.84	19.5	2.94	5.79	2.47	5.88
14	5.53	14.2	11.8	27.9	12.3	26.1	5.42	12.4
15	6.63	14.2	18.7	39.8	13	28.8	8.39	25.5
16	7.15	36.7	16.2	43	18	45.8	9.07	43.8
17	1.48	1.97	1.52	1.98	1.55	2.12	1.46	1.86
18	9.97	78.8	12.8	39.1	12.7	24.2	7.39	25.9
19	15.4	51.3	36.2	107	53.1	143	20.4	66.2
20	21.6	82.1	133	482	59.5	145	36.5	144
21	17.3	56.3	19.1	45.7	17.4	51.6	12.6	25.5
22	11.3	57.9	27.9	67.9	20.4	50.3	14.7	99.7
ALL NONPARAMETRIC

## Sheet: IO
	flat2 m	flat2 p	cor1 m	cor1 p	flat1 m	flat1 p	cor2 m	cor2 p
1	11.1	25.1	21.1	55.3	13.1	22.5	7.41	24.5
2			2.23	4.8	2.57	4.68	1.77	3.54
3	4.05	13.2	17.8	32.5	10.4	20.3	8.71	28.2
4	42.4	106	70.6	146	47.7	156	47.1	135
5	48	145	154	342	115	303	48.4	133
7	7.92	19	19.8	43.3	22.2	43.6	7.94	24.9
8	22	78.3	27.8	76.3	47.9	88	12.2	52.8
10	8.06	26.8	11.6	30.6	13.8	32.2	3.55	8.88
11	33.5	90.3	130	362	151	381	57.5	203
12	45.2	208	128	313	148	409	38.4	121
13	13.8	47.7	34.2	91	30.8	81.4	17.6	94.2
14	2.47	9.19	6.19	13.8	7.31	20.7	2.73	8.92
15	5.78	22.3	9.36	29.7	4.83	13	9.6	32.5
16	1.8	3.91	2.94	8.04	4.8	9.91	2.5	9.55
17	3.83	15.6	7.18	16.1	10.7	25.7	2.82	8.07
18	7.46	52.5	32.2	77.5	25.2	50	7.8	33.8
19	29	96.8	109	284	142	295	34.7	112
20	11.6	81.1	140	431	79.8	291	15	94.2
21	42.1	115	81.7	181	66.1	144	47	233
22	16.1	85.9	29	75.2	27	67.8	14	58.9
ALL NONPARAMETRIC
