# Supplementary material for: Differences in unilateral chest press muscle activation and kinematics on a stable versus unstable surface while holding one versus two dumbbells
Source: PeerJ. 2015 Oct 27;3:e1365. doi: 10.7717/peerj.1365 (PMC4627906; doi:10.7717/peerj.1365)
Supplement: Supplemental Information 2 [file peerj-03-1365-s002.xlsx]

## Sheet: Sheet1
Participant	1Cor 1	1Cor 2	1Cor 3	1Cor 4	1Cor 5	2Cor1	2Cor2	2Cor3	2Cor4	2Cor5	1Flt1	1Flt2	1Flt3	1Flt4	1Flt5	2Flt1	2Flt2	2Flt3	2Flt4	2Flt5
1	117	112	107	114	106	106	106	105	106	98	112	112	107	112	106	100	100	93	91	97
2	64	65	63	71	55	55	46	57	60	65	72	66	64	76	72
3	81	74	64	60	64	70	60	65	65	67	65	59	56	57	60	69	67	64	65	64
4	96	70	73	74	75	82	64	76	82	66	82	81	90	84	70	98	78	76	89	77
5	88	77	81	89	85	71	76	75	79	73	87	80	73	82	91	62	69	73	66	77
7	91	101	94	106	96	100	97	100	104	108	95	96	99	102	100	99	95	101	95	98
8	71	74	76	73	70	76	67	75	64	62	79	75	78	70	73	78	66	64	69	67
10	81	75	68	67	67	90	70	69	73	71	92	91	82	79	78	85	79	79	71	71
11	94	90	100	76	86	85	86	85	92	90	90	97	92	86	83	88	79	80	82	81
12	85	88	79	79	80	73	72	74	71	69	88	84	79	88	81	87	73	72	69	73
13	105	97	101	95	95	96	97	72	82	81	106	97	105	93	92	93	87	77	76	72
14	102	86	93	79	90	95	93	77	77	76	96	96	83	93	75	86	71	71	79	68
15	77	72	66	70	64	78	79	63	68	73	67	73	69	65	67	69	65	61	64	67
16	98	107	85	108	96	92	84	80	82	78	92	82	76	93	78	94	85	80	81	81
17	75	68	65	68	64	80	70	75	67	67	74	75	77	73	66	95	74	69	66	68
18	105	94	82	92	95	92	95	94	87	96	91	84	79	78	80	74	75	77	82	71
19	125	114	116	109	107	95	91	94	90	86	90	86	78	77	85	84	80	82	81	83
20	105	129	122	107	122	93	103	108	104	110	103	104	113	103	112	97	80	74	84	76
21	98	94	96	100	90	103	90	87	82		92	94	98	98		95	75	85	82	85
22	86	90	74	73	72	69	60	66	66	65	71	95	77	79	79	67	73	57	65	59
	1COR	2COR	1FLAT	2FLAT
1	111.2	104.2	109.8	96.2
2	63.6	56.6	70
3	68.6	65.4	59.4	65.8
4	77.6	74	81.4	83.6
5	84	74.8	82.6	69.4
7	97.6	101.8	98.4	97.6
8	72.8	68.8	75	68.8
10	71.6	74.6	84.4	77
11	89.2	87.6	89.6	82
12	82.2	71.8	84	74.8
13	98.6	85.6	98.6	81
14	90	83.6	88.6	75
15	69.8	72.2	68.2	65.2
16	98.8	83.2	84.2	84.2
17	68	71.8	73	74.4
18	93.6	92.8	82.4	75.8
19	114.2	91.2	83.2	82
20	117	103.6	107	82.2
21	95.6	90.5	95.5	84.4
22	79	65.2	80.2	64.2
